# Supplementary material for: Performance Evaluation of Host Biomarker Combinations for the Diagnosis of Serious Bacterial Infection in Young Febrile Children: A Double-Blind, Multicentre, Observational Study
Source: MDPI journal article supplement (doi:10.3390/jcm11216563), 2022-11-04
Supplement: s1 [file s1]

**Table S7. Performances of marker and clinical variable combinations using machine learning (TEST set)**

| Global population (7 days – 36 months; n=240) |                           |             |             |            |            |               |              | TRAIN Cohort       |
|-----------------------------------------------|---------------------------|-------------|-------------|------------|------------|---------------|--------------|--------------------|
| Models                                        | AUC [95% CI]              | Sensitivity | Specificity | PPV        | NPV        | LR+           | LR-          | AUC [95% CI]       |
| <b>gbm_5CV + TRAIL + MxA</b>                  | 0.826[0.770;0.880]        | 74%         | 80%         | 66%        | 85%        | <b>3.621</b>  | 0.329        | 0.854[0.815;0.893] |
| gamLoess_5CV + PCT + MxA                      | 0.819[0.762;0.874]        | 67%         | 80%         | 64%        | 82%        | 3.376         | 0.415        | 0.849[0.806;0.891] |
| glmboost_5CV + PCT + TRAIL                    | 0.827[0.772;0.882]        | 74%         | 78%         | 64%        | 85%        | 3.311         | 0.337        | 0.833[0.792;0.873] |
| gam_5CV + CRP + MxA                           | 0.807[0.747;0.866]        | 74%         | 75%         | 61%        | 84%        | 2.897         | 0.351        | 0.851[0.809;0.893] |
| gbm_5CV + TRAIL                               | 0.819[0.762;0.875]        | 80%         | 72%         | 60%        | 87%        | 2.846         | 0.281        | 0.849[0.809;0.889] |
| glmboost_5CV + CRP + TRAIL                    | 0.818[0.761;0.874]        | 75%         | 73%         | 60%        | 85%        | 2.804         | 0.341        | 0.844[0.804;0.884] |
| gamLoess_CRP + TRAIL                          | 0.820[0.765;0.875]        | 80%         | 67%         | 56%        | 86%        | 2.408         | 0.303        | 0.825[0.784;0.866] |
| gamLoess_PCT + TRAIL                          | 0.831[0.776;0.884]        | 85%         | 62%         | 55%        | 88%        | 2.249         | 0.248        | 0.800[0.755;0.845] |
| gamLoess_CRP + MxA                            | 0.797[0.735;0.859]        | 76%         | 65%         | 54%        | 84%        | 2.175         | 0.366        | 0.840[0.797;0.884] |
| ctree_5CV + CRP                               | 0.791[0.732;0.850]        | 82%         | 62%         | 54%        | 87%        | 2.149         | 0.289        | 0.818[0.777;0.860] |
| gamLoess_5CV + PCT                            | 0.775[0.711;0.838]        | 85%         | 55%         | 50%        | 87%        | 1.869         | 0.283        | 0.792[0.744;0.841] |
| gamLoess_5CV + MxA                            | 0.773[0.710;0.834]        | 87%         | 52%         | 49%        | 88%        | 1.819         | 0.251        | 0.807[0.759;0.855] |
| glm_TRAIL                                     | 0.813[0.756;0.869]        | 87%         | 52%         | 49%        | 88%        | 1.795         | 0.254        | 0.785[0.739;0.832] |
| pls_PCT + MxA                                 | 0.798[0.732;0.862]        | 83%         | 51%         | 48%        | 85%        | 1.699         | 0.327        | 0.805[0.757;0.852] |
| glm_MxA                                       | 0.711[0.639;0.782]        | 87%         | 28%         | 39%        | 80%        | 1.207         | 0.467        | 0.761[0.708;0.815] |
| glm_CRP                                       | 0.773[0.709;0.835]        | 95%         | 18%         | 38%        | 88%        | 1.159         | 0.267        | 0.783[0.735;0.832] |
| slda_5CV                                      | 0.641[0.567;0.714]        | 96%         | 8%          | 36%        | 81%        | 1.051         | 0.431        | 0.691[0.635;0.746] |
| glm_PCT                                       | 0.789[0.725;0.851]        | 95%         | 7%          | 35%        | 73%        | 1.024         | 0.68         | 0.714[0.659;0.768] |
| ≤ 3 months (7 – 91 days; n=77)                |                           |             |             |            |            |               |              |                    |
| Models                                        | AUC [95% CI]              | Sensitivity | Specificity | PPV        | NPV        | LR+           | LR-          |                    |
| multinom_5CV + MxA + CRP                      | 0.866[0.754;0.977]        | 50%         | 98%         | 89%        | 88%        | <b>31.000</b> | 0.508        |                    |
| gam_5CV + MxA + PCT                           | 0.919[0.836;1.000]        | 69%         | 97%         | 85%        | 92%        | 21.313        | 0.323        |                    |
| knn_PCT + MxA                                 | 0.903[0.828;0.978]        | 69%         | 97%         | 85%        | 92%        | 21.313        | 0.323        |                    |
| knn_CRP + MxA                                 | 0.903[0.816;0.989]        | 69%         | 95%         | 79%        | 92%        | 14.208        | 0.328        |                    |
| <b>slda_5CV + MxA + TRAIL</b>                 | <b>0.893[0.800;0.986]</b> | <b>75%</b>  | <b>92%</b>  | <b>71%</b> | <b>93%</b> | <b>9.300</b>  | <b>0.272</b> |                    |
| ctree_5CV + TRAIL                             | 0.857[0.752;0.962]        | 69%         | 89%         | 61%        | 92%        | 6.089         | 0.352        |                    |
| ctree_5CV + CRP + TRAIL                       | 0.846[0.725;0.967]        | 69%         | 89%         | 61%        | 92%        | 6.089         | 0.352        |                    |
| knn_CRP + TRAIL                               | 0.850[0.743;0.956]        | 69%         | 87%         | 58%        | 92%        | 5.328         | 0.359        |                    |
| gam_5CV + PCT + TRAIL                         | 0.865[0.775;0.864]        | 56%         | 87%         | 53%        | 89%        | 4.359         | 0.502        |                    |
| pls_PCT + TRAIL                               | 0.848[0.743;0.951]        | 56%         | 86%         | 50%        | 88%        | 3.875         | 0.512        |                    |
| glm_TRAIL                                     | 0.840[0.731;0.947]        | 75%         | 81%         | 50%        | 93%        | 3.875         | 0.31         |                    |
| glm_CRP                                       | 0.743[0.586;0.899]        | 50%         | 87%         | 50%        | 87%        | 3.875         | 0.574        |                    |
| lda_5CV + CRP                                 | 0.760[0.609;0.910]        | 69%         | 79%         | 46%        | 91%        | 3.279         | 0.395        |                    |
| glm_MxA                                       | 0.824[0.691;0.955]        | 75%         | 74%         | 43%        | 92%        | 2.906         | 0.337        |                    |
| dwdLinear_5CV + PCT                           | 0.811[0.690;0.932]        | 56%         | 81%         | 43%        | 88%        | 2.906         | 0.543        |                    |
| glm_PCT                                       | 0.793[0.654;0.931]        | 88%         | 69%         | 42%        | 96%        | 2.855         | 0.18         |                    |
| glm_5CV + MxA                                 | 0.855[0.752;0.957]        | 81%         | 66%         | 38%        | 93%        | 2.399         | 0.284        |                    |
| knn_5CV                                       | 0.622[0.478;0.765]        | 100%        | 13%         | 23%        | 100%       | 1.148         | 0            |                    |
| > 3 months (92 days – 36 months; n=163)       |                           |             |             |            |            |               |              |                    |
| Models                                        | AUC [95% CI]              | Sensitivity | Specificity | PPV        | NPV        | LR+           | LR-          |                    |
| gamLoess_5CV + CRP + TRAIL                    | 0.800[0.731;0.869]        | 69%         | 75%         | 66%        | 77%        | <b>2.736</b>  | 0.413        |                    |
| glmboost_5CV + PCT + TRAIL                    | 0.793[0.722;0.864]        | 78%         | 67%         | 63%        | 81%        | 2.389         | 0.327        |                    |
| knn_CRP + TRAIL                               | 0.792[0.721;0.863]        | 85%         | 60%         | 60%        | 85%        | 2.132         | 0.245        |                    |
| knn_PCT + MxA                                 | 0.753[0.679;0.827]        | 77%         | 63%         | 60%        | 79%        | 2.076         | 0.373        |                    |
| <b>gbm_5CV + MxA + TRAIL</b>                  | <b>0.782[0.711;0.853]</b> | <b>82%</b>  | <b>60%</b>  | <b>60%</b> | <b>83%</b> | <b>2.059</b>  | <b>0.294</b> |                    |
| gamLoess_5CV + MxA + CRP                      | 0.754[0.678;0.829]        | 82%         | 60%         | 60%        | 83%        | 2.059         | 0.294        |                    |
| gbm_5CV + PCT                                 | 0.752[0.675;0.828]        | 56%         | 73%         | 59%        | 70%        | 2.042         | 0.607        |                    |
| gbm_5CV + TRAIL                               | 0.798[0.727;0.868]        | 85%         | 58%         | 59%        | 85%        | 2.026         | 0.254        |                    |
| slda_5CV + MxA + PCT                          | 0.770[0.696;0.842]        | 78%         | 59%         | 58%        | 79%        | 1.899         | 0.374        |                    |
| gbm_5CV + MxA                                 | 0.710[0.629;0.790]        | 81%         | 57%         | 57%        | 81%        | 1.874         | 0.336        |                    |
| gamLoess_5CV + CRP                            | 0.757[0.682;0.831]        | 75%         | 58%         | 56%        | 76%        | 1.781         | 0.432        |                    |
| gamLoess_PCT + TRAIL                          | 0.809[0.740;0.877]        | 88%         | 48%         | 55%        | 85%        | 1.711         | 0.243        |                    |
| gbm_5CV                                       | 0.663[0.576;0.750]        | 68%         | 58%         | 54%        | 71%        | 1.607         | 0.559        |                    |
| glm_CRP                                       | 0.738[0.660;0.814]        | 90%         | 39%         | 51%        | 84%        | 1.469         | 0.264        |                    |
| glm_TRAIL                                     | 0.782[0.708;0.855]        | 96%         | 25%         | 48%        | 89%        | 1.279         | 0.175        |                    |
| knn_CRP + MxA                                 | 0.740[0.660;0.819]        | 93%         | 19%         | 45%        | 78%        | 1.143         | 0.388        |                    |
| glm_MxA                                       | 0.673[0.587;0.759]        | 94%         | 13%         | 44%        | 75%        | 1.077         | 0.466        |                    |
| glm_PCT                                       | 0.774[0.698;0.848]        | 96%         | 7%          | 43%        | 70%        | 1.032         | 0.599        |                    |

Models achieving the targeted performance criteria are highlighted in green (light green: LR+ ≥ 5.67 but < 8.5 and/or LR- ≤ 0.5 but > 0.3; dark green: LR+ ≥ 8.5 and LR- ≤ 0.3).

The best performing model in the global population is in bold.

Abbreviations: AUC, area under the curve; CI, confidence interval; LR-, negative likelihood ratio; LR+, positive likelihood ratio; NPV, negative predictive value; PPV, positive predictive value.
