# Supplementary material for: Performance Evaluation of Host Biomarker Combinations for the Diagnosis of Serious Bacterial Infection in Young Febrile Children: A Double-Blind, Multicentre, Observational Study
Source: MDPI journal article supplement (doi:10.3390/jcm11216563), 2022-11-04
Supplement: s1 [file s1]

Table S6. Performances of top marker combinations using logistic regression (TEST set; see also Figure 2)

| Global population (7 days – 36 months; n=240) |                       |             |             |     |     |       |      | TRAIN Cohort          |
|-----------------------------------------------|-----------------------|-------------|-------------|-----|-----|-------|------|-----------------------|
| Selected Models                               | AUC [95% CI]          | Sensitivity | Specificity | PPV | NPV | LR+   | LR-  | AUC [95% CI]          |
| Model_57: NGAL logTRAIL logMXA                | 0.831 [0.777 ; 0.886] | 76%         | 82%         | 69% | 87% | 4.21  | 0.3  | 0.826 [0.783 ; 0.869] |
| Model_63: logMXA logPCT logTRAIL              | 0.834 [0.778 ; 0.889] | 77%         | 77%         | 64% | 86% | 3.29  | 0.3  | 0.830 [0.787 ; 0.874] |
| Model_52: CRP logMXA logTRAIL                 | 0.824 [0.767 ; 0.880] | 76%         | 77%         | 63% | 86% | 3.28  | 0.32 | 0.842 [0.800 ; 0.883] |
| Model_22: logMXA logTRAIL                     | 0.814 [0.757 ; 0.871] | 77%         | 73%         | 60% | 86% | 2.85  | 0.32 | 0.820 [0.776 ; 0.864] |
| Model_27: logTRAIL CRP                        | 0.821 [0.766 ; 0.876] | 83%         | 65%         | 56% | 88% | 2.37  | 0.26 | 0.815 [0.774 ; 0.857] |
| Model_1: CRP                                  | 0.779 [0.717 ; 0.841] | 82%         | 63%         | 54% | 87% | 2.22  | 0.29 | 0.780 [0.731 ; 0.829] |
| Model_11: logPCT logTRAIL                     | 0.829 [0.774 ; 0.883] | 78%         | 64%         | 54% | 85% | 2.17  | 0.34 | 0.792 [0.746 ; 0.837] |
| Model_20: logMXA CRP                          | 0.775 [0.707 ; 0.842] | 79%         | 59%         | 50% | 84% | 1.93  | 0.35 | 0.815 [0.767 ; 0.863] |
| Model_13: logPCT logMXA                       | 0.791 [0.726 ; 0.857] | 82%         | 57%         | 50% | 85% | 1.88  | 0.32 | 0.804 [0.755 ; 0.853] |
| Model_3: logTRAIL                             | 0.815 [0.758 ; 0.871] | 87%         | 53%         | 49% | 88% | 1.84  | 0.25 | 0.785 [0.739 ; 0.831] |
| Model_5: logMXA                               | 0.709 [0.637 ; 0.782] | 88%         | 22%         | 37% | 77% | 1.12  | 0.56 | 0.758 [0.703 ; 0.812] |
| Model_7: logPCT                               | 0.789 [0.725 ; 0.853] | 94%         | 9%          | 36% | 74% | 1.03  | 0.67 | 0.706 [0.651 ; 0.761] |
| ≤ 3 months (7 – 91 days; n=77)                |                       |             |             |     |     |       |      |                       |
| Selected Models                               | AUC [95% CI]          | Sensitivity | Specificity | PPV | NPV | LR+   | LR-  |                       |
| Model_52: CRP logMXA logTRAIL                 | 0.895 [0.771 ; 1.000] | 86%         | 92%         | 71% | 97% | 10.46 | 0.16 |                       |
| Model_57: NGAL logTRAIL logMXA                | 0.883 [0.760 ; 1.000] | 79%         | 92%         | 69% | 95% | 9.59  | 0.23 |                       |
| Model_63: logMXA logPCT logTRAIL              | 0.881 [0.760 ; 1.000] | 79%         | 92%         | 69% | 95% | 9.43  | 0.23 |                       |
| Model_22: logMXA logTRAIL                     | 0.878 [0.756 ; 1.000] | 79%         | 90%         | 65% | 95% | 7.99  | 0.24 |                       |
| Model_27: logTRAIL CRP                        | 0.861 [0.751 ; 0.972] | 73%         | 86%         | 55% | 93% | 5.05  | 0.31 |                       |
| Model_1: CRP                                  | 0.766 [0.607 ; 0.925] | 60%         | 87%         | 53% | 90% | 4.65  | 0.46 |                       |
| Model_11: logPCT logTRAIL                     | 0.845 [0.734 ; 0.955] | 67%         | 85%         | 53% | 91% | 4.52  | 0.39 |                       |
| Model_3: logTRAIL                             | 0.837 [0.723 ; 0.950] | 73%         | 77%         | 44% | 92% | 3.25  | 0.34 |                       |
| Model_20: logMXA CRP                          | 0.885 [0.759 ; 1.000] | 86%         | 71%         | 40% | 96% | 2.91  | 0.2  |                       |
| Model_13: logPCT logMXA                       | 0.876 [0.764 ; 0.989] | 79%         | 70%         | 38% | 93% | 2.62  | 0.31 |                       |
| Model_5: logMXA                               | 0.828 [0.685 ; 0.971] | 93%         | 21%         | 21% | 93% | 1.18  | 0.34 |                       |
| Model_7: logPCT                               | 0.792 [0.644 ; 0.941] | 93%         | 12%         | 21% | 88% | 1.05  | 0.58 |                       |
| > 3 months (92 days – 36 months; n=163)       |                       |             |             |     |     |       |      |                       |
| Selected Models                               | AUC [95% CI]          | Sensitivity | Specificity | PPV | NPV | LR+   | LR-  |                       |
| Model_57: NGAL logTRAIL logMXA                | 0.782 [0.710 ; 0.854] | 75%         | 76%         | 69% | 81% | 3.1   | 0.33 |                       |
| Model_63: logMXA logPCT logTRAIL              | 0.791 [0.719 ; 0.862] | 77%         | 67%         | 63% | 80% | 2.32  | 0.35 |                       |
| Model_52: CRP logMXA logTRAIL                 | 0.766 [0.692 ; 0.841] | 74%         | 67%         | 62% | 78% | 2.25  | 0.39 |                       |
| Model_22: logMXA logTRAIL                     | 0.759 [0.684 ; 0.835] | 77%         | 62%         | 59% | 79% | 2.02  | 0.38 |                       |
| Model_27: logTRAIL CRP                        | 0.779 [0.706 ; 0.851] | 85%         | 52%         | 56% | 83% | 1.76  | 0.29 |                       |
| Model_1: CRP                                  | 0.738 [0.660 ; 0.815] | 87%         | 47%         | 54% | 83% | 1.65  | 0.28 |                       |
| Model_11: logPCT logTRAIL                     | 0.804 [0.735 ; 0.874] | 81%         | 50%         | 54% | 78% | 1.62  | 0.38 |                       |
| Model_20: logMXA CRP                          | 0.722 [0.640 ; 0.805] | 78%         | 52%         | 54% | 77% | 1.61  | 0.43 |                       |
| Model_13: logPCT logMXA                       | 0.756 [0.677 ; 0.836] | 82%         | 48%         | 53% | 79% | 1.58  | 0.37 |                       |
| Model_3: logTRAIL                             | 0.782 [0.709 ; 0.855] | 90%         | 37%         | 50% | 83% | 1.42  | 0.28 |                       |
| Model_5: logMXA                               | 0.673 [0.588 ; 0.759] | 87%         | 22%         | 44% | 70% | 1.11  | 0.6  |                       |
| Model_7: logPCT                               | 0.771 [0.695 ; 0.847] | 94%         | 7%          | 42% | 64% | 1.02  | 0.79 |                       |

Models achieving the targeted performance criteria are highlighted in green (light green: LR+ ≥ 5.67 but < 8.5 and/or LR- ≤ 0.5 but > 0.3; dark green: LR+ ≥ 8.5 and LR- ≤ 0.3).  
The best performing model in the global population (model 57) is highlighted in red. See respective ROC curves and Forest Plots in Figure 2.  
Abbreviations: AUC, area under the curve; CI, confidence interval; LR-, negative likelihood ratio; LR+, positive likelihood ratio; NPV, negative predictive value; PPV, positive predictive value.
