# Supplementary material for: Performance Evaluation of Host Biomarker Combinations for the Diagnosis of Serious Bacterial Infection in Young Febrile Children: A Double-Blind, Multicentre, Observational Study
Source: MDPI journal article supplement (doi:10.3390/jcm11216563), 2022-11-04
Supplement: s1 [file s1]

Table S5. Performances of marker combinations using logistic regression (TEST set; parameters estimated at the threshold of the TRAIN cohort)

| Global population (7 days – 36 months; n=240) |                       |             |             |     |     |      |      | TRAIN Cohort          |
|-----------------------------------------------|-----------------------|-------------|-------------|-----|-----|------|------|-----------------------|
| Models (N=98)                                 | AUC [95% CI]          | Sensitivity | Specificity | PPV | NPV | LR+  | LR-  | AUC [95% CI]          |
| Model 57: NGAL logTRAIL logMXA                | 0.831 [0.777 ; 0.886] | 76%         | 82%         | 69% | 87% | 4.21 | 0.3  | 0.826 [0.783 ; 0.869] |
| Model 65: logMXA logPCT logTRAIL logIL6       | 0.828 [0.772 ; 0.883] | 74%         | 79%         | 66% | 85% | 3.58 | 0.32 | 0.831 [0.787 ; 0.875] |
| Model 76: logMXA logTRAIL CRP NGAL            | 0.827 [0.771 ; 0.883] | 76%         | 78%         | 65% | 86% | 3.47 | 0.31 | 0.842 [0.800 ; 0.883] |
| Model 66: logMXA logPCT logTRAIL CRP          | 0.829 [0.773 ; 0.884] | 76%         | 78%         | 65% | 86% | 3.43 | 0.31 | 0.841 [0.799 ; 0.883] |
| Model 78: logMXA logTRAIL logIL6 logIP_10     | 0.810 [0.753 ; 0.867] | 73%         | 78%         | 64% | 85% | 3.36 | 0.34 | 0.829 [0.786 ; 0.873] |
| Model 37: logIL6 logTRAIL logMXA              | 0.810 [0.752 ; 0.867] | 73%         | 78%         | 64% | 85% | 3.36 | 0.34 | 0.830 [0.786 ; 0.873] |
| Model 64: logMXA logPCT logTRAIL logIP_10     | 0.832 [0.777 ; 0.887] | 76%         | 77%         | 64% | 86% | 3.33 | 0.32 | 0.831 [0.787 ; 0.874] |
| Model 74: logMXA logTRAIL CRP logIL6          | 0.818 [0.761 ; 0.875] | 74%         | 78%         | 64% | 85% | 3.32 | 0.33 | 0.844 [0.803 ; 0.886] |
| Model 63: logMXA logPCT logTRAIL              | 0.834 [0.778 ; 0.889] | 77%         | 77%         | 64% | 86% | 3.29 | 0.3  | 0.830 [0.787 ; 0.874] |
| Model 75: logMXA logTRAIL CRP logIP_10        | 0.824 [0.768 ; 0.880] | 76%         | 77%         | 63% | 86% | 3.28 | 0.32 | 0.842 [0.801 ; 0.883] |
| Model 52: CRP logMXA logTRAIL                 | 0.824 [0.767 ; 0.880] | 76%         | 77%         | 63% | 86% | 3.28 | 0.32 | 0.842 [0.800 ; 0.883] |
| Model 77: logMXA logTRAIL logIL6 NGAL         | 0.820 [0.764 ; 0.876] | 74%         | 76%         | 62% | 85% | 3.05 | 0.34 | 0.832 [0.788 ; 0.875] |
| Model 67: logMXA logPCT logTRAIL NGAL         | 0.839 [0.784 ; 0.893] | 77%         | 75%         | 62% | 86% | 3.03 | 0.31 | 0.830 [0.786 ; 0.873] |
| Model 85: logPCT NGAL logIP_10 logTRAIL       | 0.823 [0.768 ; 0.879] | 76%         | 74%         | 61% | 85% | 2.87 | 0.33 | 0.807 [0.762 ; 0.852] |
| Model 69: logMXA logPCT logIP_10 logIL6       | 0.799 [0.738 ; 0.860] | 67%         | 77%         | 60% | 81% | 2.87 | 0.43 | 0.819 [0.770 ; 0.867] |
| Model 22: logMXA logTRAIL                     | 0.814 [0.757 ; 0.871] | 77%         | 73%         | 60% | 86% | 2.85 | 0.32 | 0.820 [0.776 ; 0.864] |
| Model 79: logMXA logTRAIL NGAL logIP_10       | 0.832 [0.777 ; 0.887] | 78%         | 72%         | 59% | 86% | 2.77 | 0.31 | 0.825 [0.782 ; 0.868] |
| Model 92: logPCT logIP_10 logTRAIL logIL6     | 0.807 [0.749 ; 0.865] | 74%         | 73%         | 59% | 84% | 2.71 | 0.36 | 0.813 [0.768 ; 0.858] |
| Model 54: NGAL logIP_10 logTRAIL              | 0.832 [0.778 ; 0.887] | 84%         | 69%         | 59% | 89% | 2.7  | 0.23 | 0.792 [0.747 ; 0.837] |
| Model 62: logIP_10 logPCT logTRAIL            | 0.814 [0.758 ; 0.871] | 72%         | 73%         | 59% | 83% | 2.67 | 0.38 | 0.805 [0.759 ; 0.850] |
| Model 68: logMXA logPCT logIP_10 NGAL         | 0.821 [0.763 ; 0.878] | 74%         | 71%         | 58% | 84% | 2.6  | 0.36 | 0.819 [0.771 ; 0.867] |
| Model 97: NGAL logTRAIL logIL6 logIP_10       | 0.805 [0.747 ; 0.862] | 80%         | 69%         | 58% | 87% | 2.6  | 0.3  | 0.809 [0.764 ; 0.853] |
| Model 80: logMXA CRP NGAL logIP_10            | 0.802 [0.742 ; 0.862] | 78%         | 69%         | 57% | 86% | 2.54 | 0.32 | 0.821 [0.774 ; 0.869] |
| Model 34: logIL6 logTRAIL logIP_10            | 0.790 [0.731 ; 0.849] | 81%         | 68%         | 57% | 87% | 2.54 | 0.28 | 0.805 [0.760 ; 0.851] |
| Model 61: logIP_10 logMXA logTRAIL            | 0.819 [0.763 ; 0.876] | 81%         | 68%         | 57% | 87% | 2.51 | 0.29 | 0.822 [0.779 ; 0.866] |
| Model 93: logPCT CRP logTRAIL logIL6          | 0.812 [0.756 ; 0.869] | 77%         | 69%         | 57% | 85% | 2.49 | 0.33 | 0.818 [0.776 ; 0.861] |
| Model 45: CRP NGAL logTRAIL                   | 0.824 [0.770 ; 0.879] | 82%         | 67%         | 57% | 88% | 2.47 | 0.27 | 0.815 [0.773 ; 0.857] |
| Model 88: logPCT NGAL logIL6 logTRAIL         | 0.821 [0.765 ; 0.877] | 82%         | 67%         | 57% | 87% | 2.44 | 0.27 | 0.799 [0.754 ; 0.844] |
| Model 89: logPCT NGAL CRP logTRAIL            | 0.825 [0.771 ; 0.880] | 83%         | 66%         | 57% | 88% | 2.43 | 0.26 | 0.814 [0.772 ; 0.856] |
| Model 49: CRP logPCT logTRAIL                 | 0.823 [0.768 ; 0.878] | 83%         | 66%         | 57% | 88% | 2.43 | 0.26 | 0.814 [0.772 ; 0.856] |
| Model 36: logIL6 logTRAIL NGAL                | 0.813 [0.756 ; 0.870] | 82%         | 66%         | 56% | 87% | 2.43 | 0.27 | 0.800 [0.755 ; 0.845] |
| Model 29: logIL6 CRP logTRAIL                 | 0.812 [0.755 ; 0.868] | 77%         | 68%         | 56% | 85% | 2.42 | 0.34 | 0.822 [0.780 ; 0.863] |
| Model 94: NGAL CRP logTRAIL logIL6            | 0.811 [0.754 ; 0.867] | 77%         | 68%         | 56% | 85% | 2.42 | 0.34 | 0.822 [0.780 ; 0.864] |
| Model 90: logPCT logIP_10 CRP logTRAIL        | 0.811 [0.755 ; 0.867] | 71%         | 70%         | 56% | 82% | 2.4  | 0.41 | 0.821 [0.777 ; 0.865] |
| Model 26: logTRAIL logIL6                     | 0.803 [0.745 ; 0.861] | 81%         | 66%         | 56% | 87% | 2.39 | 0.29 | 0.800 [0.755 ; 0.845] |
| Model 58: NGAL logTRAIL logPCT                | 0.837 [0.783 ; 0.890] | 80%         | 67%         | 56% | 86% | 2.37 | 0.31 | 0.791 [0.746 ; 0.837] |
| Model 27: logTRAIL CRP                        | 0.821 [0.766 ; 0.876] | 83%         | 65%         | 56% | 88% | 2.37 | 0.26 | 0.815 [0.774 ; 0.857] |
| Model 35: logIL6 logTRAIL logPCT              | 0.815 [0.758 ; 0.872] | 80%         | 67%         | 56% | 86% | 2.37 | 0.31 | 0.800 [0.755 ; 0.845] |
| Model 86: logPCT NGAL logIP_10 CRP            | 0.794 [0.734 ; 0.854] | 75%         | 68%         | 56% | 84% | 2.36 | 0.37 | 0.810 [0.763 ; 0.857] |
| Model 17: NGAL logTRAIL                       | 0.835 [0.781 ; 0.890] | 87%         | 62%         | 55% | 90% | 2.31 | 0.21 | 0.786 [0.741 ; 0.832] |
| Model 98: CRP logTRAIL logIL6 logIP_10        | 0.799 [0.742 ; 0.857] | 74%         | 68%         | 55% | 83% | 2.31 | 0.39 | 0.826 [0.783 ; 0.869] |
| Model 12: logPCT logIP_10                     | 0.786 [0.724 ; 0.849] | 76%         | 67%         | 55% | 84% | 2.31 | 0.36 | 0.785 [0.736 ; 0.834] |
| Model 95: NGAL CRP logTRAIL logIP_10          | 0.817 [0.761 ; 0.872] | 81%         | 65%         | 55% | 86% | 2.3  | 0.3  | 0.819 [0.776 ; 0.862] |
| Model 23: logIP_10 logTRAIL                   | 0.810 [0.753 ; 0.867] | 84%         | 63%         | 55% | 88% | 2.28 | 0.25 | 0.785 [0.738 ; 0.831] |
| Model 55: NGAL logIP_10 logPCT                | 0.805 [0.745 ; 0.865] | 76%         | 67%         | 55% | 84% | 2.26 | 0.36 | 0.793 [0.745 ; 0.841] |
| Model 70: logMXA logPCT logIP_10 CRP          | 0.806 [0.747 ; 0.866] | 79%         | 64%         | 54% | 85% | 2.22 | 0.32 | 0.826 [0.779 ; 0.873] |
| Model 1: CRP                                  | 0.779 [0.717 ; 0.841] | 82%         | 63%         | 54% | 87% | 2.22 | 0.29 | 0.780 [0.731 ; 0.829] |
| Model 60: logIP_10 logMXA logPCT              | 0.805 [0.745 ; 0.865] | 81%         | 64%         | 54% | 86% | 2.21 | 0.31 | 0.815 [0.767 ; 0.864] |
| Model 50: CRP logPCT logIP_10                 | 0.786 [0.725 ; 0.847] | 75%         | 66%         | 54% | 83% | 2.19 | 0.38 | 0.808 [0.760 ; 0.855] |
| Model 39: logIL6 logIP_10 logPCT              | 0.781 [0.717 ; 0.845] | 76%         | 65%         | 54% | 84% | 2.18 | 0.37 | 0.799 [0.750 ; 0.847] |
| Model 11: logPCT logTRAIL                     | 0.829 [0.774 ; 0.883] | 78%         | 64%         | 54% | 85% | 2.17 | 0.34 | 0.792 [0.746 ; 0.837] |
| Model 53: CRP logIP_10 logTRAIL               | 0.810 [0.754 ; 0.866] | 84%         | 61%         | 53% | 88% | 2.14 | 0.26 | 0.819 [0.776 ; 0.862] |
| Model 15: NGAL CRP                            | 0.797 [0.737 ; 0.857] | 84%         | 61%         | 53% | 88% | 2.14 | 0.26 | 0.778 [0.730 ; 0.826] |
| Model 51: CRP logMXA logIP_10                 | 0.783 [0.719 ; 0.848] | 79%         | 63%         | 53% | 85% | 2.13 | 0.33 | 0.819 [0.771 ; 0.867] |
| Model 72: logMXA logPCT NGAL logIL6           | 0.801 [0.738 ; 0.863] | 82%         | 61%         | 53% | 86% | 2.1  | 0.3  | 0.809 [0.760 ; 0.857] |
| Model 91: logPCT logIP_10 CRP logIL6          | 0.780 [0.718 ; 0.842] | 75%         | 63%         | 52% | 82% | 2.03 | 0.4  | 0.813 [0.766 ; 0.860] |
| Model 47: CRP NGAL logMXA                     | 0.791 [0.727 ; 0.855] | 79%         | 60%         | 51% | 85% | 1.99 | 0.34 | 0.818 [0.771 ; 0.865] |
| Model 82: logMXA CRP logIP_10 logIL6          | 0.783 [0.720 ; 0.845] | 79%         | 60%         | 51% | 85% | 1.96 | 0.35 | 0.826 [0.779 ; 0.873] |
| Model 96: NGAL CRP logIL6 logIP_10            | 0.772 [0.710 ; 0.834] | 72%         | 63%         | 51% | 81% | 1.96 | 0.44 | 0.810 [0.763 ; 0.857] |
| Model 9: logPCT CRP                           | 0.794 [0.733 ; 0.854] | 88%         | 55%         | 51% | 90% | 1.95 | 0.22 | 0.775 [0.727 ; 0.823] |
| Model 20: logMXA CRP                          | 0.775 [0.707 ; 0.842] | 79%         | 59%         | 50% | 84% | 1.93 | 0.35 | 0.815 [0.767 ; 0.863] |
| Model 44: CRP NGAL logPCT                     | 0.803 [0.743 ; 0.862] | 84%         | 56%         | 50% | 87% | 1.9  | 0.28 | 0.774 [0.726 ; 0.822] |
| Model 13: logPCT logMXA                       | 0.791 [0.726 ; 0.857] | 82%         | 57%         | 50% | 85% | 1.88 | 0.32 | 0.804 [0.755 ; 0.853] |
| Model 46: CRP NGAL logIP_10                   | 0.785 [0.724 ; 0.845] | 75%         | 60%         | 50% | 82% | 1.86 | 0.42 | 0.795 [0.747 ; 0.843] |
| Model 48: CRP logPCT logMXA                   | 0.791 [0.726 ; 0.857] | 81%         | 57%         | 50% | 85% | 1.85 | 0.35 | 0.819 [0.772 ; 0.866] |
| Model 3: logTRAIL                             | 0.815 [0.758 ; 0.871] | 87%         | 53%         | 49% | 88% | 1.84 | 0.25 | 0.785 [0.739 ; 0.831] |
| Model 59: NGAL logMXA logPCT                  | 0.809 [0.748 ; 0.871] | 85%         | 53%         | 49% | 87% | 1.83 | 0.28 | 0.807 [0.758 ; 0.855] |
| Model 40: logIL6 logIP_10 NGAL                | 0.762 [0.698 ; 0.826] | 70%         | 62%         | 49% | 80% | 1.83 | 0.49 | 0.782 [0.733 ; 0.831] |
| Model 42: logIL6 logMXA logPCT                | 0.787 [0.722 ; 0.852] | 82%         | 55%         | 49% | 85% | 1.82 | 0.33 | 0.806 [0.757 ; 0.855] |
| Model 73: logMXA logPCT CRP logIL6            | 0.787 [0.722 ; 0.852] | 81%         | 56%         | 49% | 84% | 1.82 | 0.35 | 0.821 [0.775 ; 0.868] |
| Model 33: logIL6 CRP logIP_10                 | 0.763 [0.700 ; 0.826] | 75%         | 59%         | 49% | 81% | 1.8  | 0.43 | 0.808 [0.760 ; 0.855] |
| Model 71: logMXA logPCT NGAL CRP              | 0.798 [0.733 ; 0.862] | 81%         | 55%         | 49% | 84% | 1.77 | 0.36 | 0.820 [0.773 ; 0.867] |
| Model 16: NGAL logIL6                         | 0.743 [0.678 ; 0.809] | 90%         | 48%         | 48% | 90% | 1.73 | 0.2  | 0.726 [0.673 ; 0.778] |
| Model 32: logIL6 CRP logMXA                   | 0.773 [0.707 ; 0.840] | 82%         | 51%         | 47% | 84% | 1.68 | 0.36 | 0.820 [0.773 ; 0.867] |
| Model 28: logIL6 CRP                          | 0.758 [0.692 ; 0.824] | 80%         | 52%         | 47% | 83% | 1.67 | 0.39 | 0.782 [0.733 ; 0.831] |
| Model 30: logIL6 CRP logPCT                   | 0.768 [0.703 ; 0.832] | 78%         | 53%         | 47% | 82% | 1.66 | 0.41 | 0.780 [0.731 ; 0.829] |
| Model 31: logIL6 CRP NGAL                     | 0.764 [0.698 ; 0.829] | 77%         | 54%         | 47% | 82% | 1.66 | 0.43 | 0.783 [0.734 ; 0.832] |
| Model 81: logMXA CRP NGAL logIL6              | 0.778 [0.712 ; 0.843] | 81%         | 51%         | 47% | 83% | 1.65 | 0.38 | 0.821 [0.774 ; 0.868] |
| Model 87: logPCT NGAL logIL6 CRP              | 0.769 [0.705 ; 0.834] | 77%         | 53%         | 47% | 81% | 1.64 | 0.43 | 0.780 [0.731 ; 0.829] |
| Model 25: logIP_10 logIL6                     | 0.714 [0.646 ; 0.781] | 72%         | 55%         | 46% | 79% | 1.6  | 0.51 | 0.769 [0.719 ; 0.820] |
| Model 43: logIL6 NGAL logPCT                  | 0.784 [0.721 ; 0.847] | 89%         | 44%         | 46% | 88% | 1.59 | 0.25 | 0.736 [0.684 ; 0.789] |
| Model 8: logPCT NGAL                          | 0.814 [0.755 ; 0.874] | 92%         | 41%         | 45% | 90% | 1.54 | 0.21 | 0.718 [0.664 ; 0.771] |
| Model 21: logMXA logIL6                       | 0.736 [0.668 ; 0.804] | 79%         | 48%         | 45% | 82% | 1.53 | 0.43 | 0.792 [0.742 ; 0.843] |
| Model 83: logMXA NGAL logIP_10 logIL6         | 0.784 [0.723 ; 0.846] | 93%         | 37%         | 43% | 91% | 1.46 | 0.2  | 0.807 [0.758 ; 0.856] |
| Model 6: NGAL                                 | 0.799 [0.739 ; 0.859] | 93%         | 34%         | 43% | 90% | 1.41 | 0.21 | 0.673 [0.617 ; 0.729] |
| Model 2: logIL6                               | 0.676 [0.606 ; 0.747] | 86%         | 40%         | 43% | 84% | 1.41 | 0.37 | 0.714 [0.660 ; 0.767] |
| Model 56: NGAL logIP_10 logMXA                | 0.800 [0.742 ; 0.859] | 93%         | 34%         | 43% | 90% | 1.4  | 0.22 | 0.788 [0.736 ; 0.840] |
| Model 38: logIL6 logIP_10 logMXA              | 0.748 [0.682 ; 0.813] | 90%         | 33%         | 42% | 87% | 1.35 | 0.29 | 0.800 [0.750 ; 0.850] |
| Model 84: logPCT NGAL logIP_10 logIL6         | 0.795 [0.733 ; 0.857] | 95%         | 29%         | 42% | 92% | 1.34 | 0.17 | 0.803 [0.755 ; 0.851] |
| Model 24: logIP_10 CRP                        | 0.763 [0.701 ; 0.826] | 96%         | 26%         | 41% | 93% | 1.31 | 0.14 | 0.786 [0.737 ; 0.835] |
| Model 10: logPCT logIL6                       | 0.767 [0.701 ; 0.832] | 93%         | 28%         | 41% | 88% | 1.3  | 0.26 | 0.731 [0.678 ; 0.784] |
| Model 14: NGAL logMXA                         | 0.791 [0.730 ; 0.853] | 94%         | 27%         | 40% | 89% | 1.29 | 0.23 | 0.782 [0.730 ; 0.834] |
| Model 18: NGAL logIP_10                       | 0.787 [0.725 ; 0.849] | 95%         | 26%         | 41% | 91% | 1.29 | 0.19 | 0.740 [0.688 ; 0.792] |
| Model 41: logIL6 logMXA NGAL                  | 0.773 [0.709 ; 0.837] | 93%         | 28%         | 40% | 88% | 1.28 | 0.27 | 0.799 [0.749 ; 0.848] |
| Model 19: logMXA logIP_10                     | 0.716 [0.645 ; 0.788] | 89%         | 28%         | 40% | 83% | 1.24 | 0.39 | 0.765 [0.711 ; 0.819] |
| Model 5: logMXA                               | 0.709 [0.637 ; 0.782] | 88%         | 22%         | 37% | 77% | 1.12 | 0.56 | 0.758 [0.703 ; 0.812] |
| Model 7: logPCT                               | 0.789 [0.725 ; 0.853] | 94%         | 9%          | 36% | 74% | 1.03 | 0.67 | 0.706 [0.651 ; 0.761] |
| Model 4: logIP_10                             | 0.643 [0.570 ; 0.716] | 99%         | 5%          | 35% | 88% | 1.03 | 0.27 | 0.678 [0.621 ; 0.735] |

| ≤ 3 months (7 – 91 days; n=77)            |                       |             |             |     |      |       |      |
|-------------------------------------------|-----------------------|-------------|-------------|-----|------|-------|------|
| Models (N=98)                             | AUC [95% CI]          | Sensitivity | Specificity | PPV | NPV  | LR+   | LR-  |
| Model 37: logIL6 logTRAIL logMXA          | 0.884 [0.780 ; 0.989] | 71%         | 93%         | 71% | 93%  | 10.89 | 0.31 |
| Model 78: logMXA logTRAIL logIL6 logIP_10 | 0.884 [0.780 ; 0.989] | 71%         | 93%         | 71% | 93%  | 10.89 | 0.31 |
| Model 75: logMXA logTRAIL CRP logIP_10    | 0.896 [0.775 ; 1.000] | 86%         | 92%         | 71% | 97%  | 10.46 | 0.16 |
| Model 52: CRP logMXA logTRAIL             | 0.895 [0.771 ; 1.000] | 86%         | 92%         | 71% | 97%  | 10.46 | 0.16 |
| Model 76: logMXA logTRAIL CRP NGAL        | 0.891 [0.764 ; 1.000] | 86%         | 92%         | 71% | 97%  | 10.46 | 0.16 |
| Model 66: logMXA logPCT logTRAIL CRP      | 0.889 [0.764 ; 1.000] | 86%         | 92%         | 71% | 97%  | 10.29 | 0.16 |
| Model 74: logMXA logTRAIL CRP logIL6      | 0.898 [0.791 ; 1.000] | 79%         | 92%         | 69% | 95%  | 9.59  | 0.23 |
| Model 57: NGAL logTRAIL logMXA            | 0.883 [0.760 ; 1.000] | 79%         | 92%         | 69% | 95%  | 9.59  | 0.23 |
| Model 67: logMXA logPCT logTRAIL NGAL     | 0.885 [0.764 ; 1.000] | 79%         | 92%         | 69% | 95%  | 9.43  | 0.23 |
| Model 64: logMXA logPCT logTRAIL logIP_10 | 0.882 [0.761 ; 1.000] | 79%         | 92%         | 69% | 95%  | 9.43  | 0.23 |
| Model 63: logMXA logPCT logTRAIL          | 0.881 [0.760 ; 1.000] | 79%         | 92%         | 69% | 95%  | 9.43  | 0.23 |
| Model 77: logMXA logTRAIL logIL6 NGAL     | 0.891 [0.789 ; 0.993] | 71%         | 92%         | 67% | 93%  | 8.71  | 0.31 |
| Model 65: logMXA logPCT logTRAIL logIL6   | 0.889 [0.787 ; 0.991] | 71%         | 92%         | 67% | 93%  | 8.57  | 0.31 |
| Model 22: logMXA logTRAIL                 | 0.878 [0.756 ; 1.000] | 79%         | 90%         | 65% | 95%  | 7.99  | 0.24 |
| Model 45: CRP NGAL logTRAIL               | 0.860 [0.750 ; 0.971] | 67%         | 90%         | 63% | 92%  | 6.89  | 0.37 |
| Model 79: logMXA logTRAIL NGAL logIP_10   | 0.883 [0.765 ; 1.000] | 79%         | 89%         | 61% | 95%  | 6.85  | 0.24 |
| Model 54: NGAL logIP_10 logTRAIL          | 0.861 [0.752 ; 0.971] | 73%         | 89%         | 61% | 93%  | 6.5   | 0.3  |
| Model 15: NGAL CRP                        | 0.775 [0.615 ; 0.936] | 67%         | 89%         | 59% | 92%  | 5.91  | 0.38 |
| Model 49: CRP logPCT logTRAIL             | 0.860 [0.751 ; 0.969] | 67%         | 89%         | 59% | 92%  | 5.81  | 0.38 |
| Model 89: logPCT NGAL CRP logTRAIL        | 0.859 [0.750 ; 0.968] | 67%         | 89%         | 59% | 92%  | 5.81  | 0.38 |
| Model 90: logPCT logIP_10 CRP logTRAIL    | 0.873 [0.758 ; 0.989] | 73%         | 87%         | 58% | 93%  | 5.59  | 0.31 |
| Model 85: logPCT NGAL logIP_10 logTRAIL   | 0.858 [0.741 ; 0.974] | 73%         | 87%         | 58% | 93%  | 5.59  | 0.31 |
| Model 86: logPCT NGAL logIP_10 CRP        | 0.864 [0.744 ; 0.985] | 80%         | 85%         | 57% | 95%  | 5.42  | 0.24 |
| Model 92: logPCT logIP_10 logTRAIL logIL6 | 0.861 [0.756 ; 0.967] | 80%         | 85%         | 57% | 95%  | 5.42  | 0.24 |
| Model 55: NGAL logIP_10 logPCT            | 0.854 [0.734 ; 0.973] | 80%         | 85%         | 57% | 95%  | 5.42  | 0.24 |
| Model 69: logMXA logPCT logIP_10 logIL6   | 0.879 [0.766 ; 0.991] | 71%         | 87%         | 56% | 93%  | 5.36  | 0.33 |
| Model 61: logIP_10 logMXA logTRAIL        | 0.888 [0.776 ; 0.999] | 79%         | 85%         | 55% | 95%  | 5.33  | 0.25 |
| Model 80: logMXA CRP NGAL logIP_10        | 0.886 [0.756 ; 1.000] | 86%         | 84%         | 55% | 96%  | 5.23  | 0.17 |
| Model 93: logPCT CRP logTRAIL logIL6      | 0.848 [0.740 ; 0.957] | 60%         | 89%         | 56% | 90%  | 5.23  | 0.45 |
| Model 68: logMXA logPCT logIP_10 NGAL     | 0.882 [0.751 ; 1.000] | 86%         | 83%         | 55% | 96%  | 5.14  | 0.17 |
| Model 62: logIP_10 logPCT logTRAIL        | 0.859 [0.744 ; 0.975] | 67%         | 87%         | 56% | 91%  | 5.08  | 0.38 |
| Model 27: logTRAIL CRP                    | 0.861 [0.751 ; 0.972] | 73%         | 86%         | 55% | 93%  | 5.05  | 0.31 |
| Model 29: logIL6 CRP logTRAIL             | 0.848 [0.739 ; 0.957] | 60%         | 87%         | 53% | 90%  | 4.65  | 0.46 |
| Model 94: NGAL CRP logTRAIL logIL6        | 0.846 [0.738 ; 0.955] | 60%         | 87%         | 53% | 90%  | 4.65  | 0.46 |
| Model 1: CRP                              | 0.766 [0.607 ; 0.925] | 60%         | 87%         | 53% | 90%  | 4.65  | 0.46 |
| Model 95: NGAL CRP logTRAIL logIP_10      | 0.872 [0.761 ; 0.983] | 73%         | 84%         | 52% | 93%  | 4.55  | 0.32 |
| Model 17: NGAL logTRAIL                   | 0.855 [0.746 ; 0.964] | 73%         | 84%         | 52% | 93%  | 4.55  | 0.32 |
| Model 58: NGAL logTRAIL logPCT            | 0.850 [0.741 ; 0.960] | 67%         | 85%         | 53% | 91%  | 4.52  | 0.39 |
| Model 11: logPCT logTRAIL                 | 0.845 [0.734 ; 0.955] | 67%         | 85%         | 53% | 91%  | 4.52  | 0.39 |
| Model 12: logPCT logIP_10                 | 0.854 [0.734 ; 0.973] | 80%         | 82%         | 52% | 94%  | 4.44  | 0.24 |
| Model 98: CRP logTRAIL logIL6 logIP_10    | 0.853 [0.745 ; 0.960] | 73%         | 82%         | 50% | 93%  | 4.13  | 0.32 |
| Model 23: logIP_10 logTRAIL               | 0.849 [0.740 ; 0.959] | 73%         | 82%         | 50% | 93%  | 4.13  | 0.32 |
| Model 97: NGAL logTRAIL logIL6 logIP_10   | 0.849 [0.742 ; 0.957] | 80%         | 81%         | 50% | 94%  | 4.13  | 0.25 |
| Model 88: logPCT NGAL logIL6 logTRAIL     | 0.839 [0.731 ; 0.947] | 73%         | 82%         | 50% | 93%  | 4.07  | 0.33 |
| Model 9: logPCT CRP                       | 0.804 [0.648 ; 0.961] | 80%         | 80%         | 50% | 94%  | 4.07  | 0.25 |
| Model 51: CRP logMXA logIP_10             | 0.890 [0.765 ; 1.000] | 86%         | 79%         | 48% | 96%  | 4.02  | 0.18 |
| Model 60: logIP_10 logMXA logPCT          | 0.885 [0.756 ; 1.000] | 86%         | 78%         | 48% | 96%  | 3.96  | 0.18 |
| Model 53: CRP logIP_10 logTRAIL           | 0.872 [0.761 ; 0.983] | 80%         | 79%         | 48% | 94%  | 3.82  | 0.25 |
| Model 34: logIL6 logTRAIL logIP_10        | 0.840 [0.733 ; 0.947] | 80%         | 79%         | 48% | 94%  | 3.82  | 0.25 |
| Model 50: CRP logPCT logIP_10             | 0.866 [0.745 ; 0.986] | 80%         | 79%         | 48% | 94%  | 3.75  | 0.25 |
| Model 91: logPCT logIP_10 CRP logIL6      | 0.856 [0.745 ; 0.966] | 80%         | 79%         | 48% | 94%  | 3.75  | 0.25 |
| Model 44: CRP NGAL logPCT                 | 0.799 [0.644 ; 0.954] | 73%         | 80%         | 48% | 93%  | 3.73  | 0.33 |
| Model 35: logIL6 logTRAIL logPCT          | 0.832 [0.723 ; 0.941] | 67%         | 82%         | 48% | 91%  | 3.7   | 0.41 |
| Model 70: logMXA logPCT logIP_10 CRP      | 0.895 [0.766 ; 1.000] | 86%         | 77%         | 46% | 96%  | 3.67  | 0.19 |
| Model 36: logIL6 logTRAIL NGAL            | 0.833 [0.725 ; 0.941] | 73%         | 79%         | 46% | 93%  | 3.5   | 0.34 |
| Model 39: logIL6 logIP_10 logPCT          | 0.859 [0.747 ; 0.971] | 80%         | 77%         | 46% | 94%  | 3.49  | 0.26 |
| Model 3: logTRAIL                         | 0.837 [0.723 ; 0.950] | 73%         | 77%         | 44% | 92%  | 3.25  | 0.34 |
| Model 47: CRP NGAL logMXA                 | 0.875 [0.737 ; 1.000] | 86%         | 72%         | 41% | 96%  | 3.08  | 0.2  |
| Model 72: logMXA logPCT NGAL logIL6       | 0.880 [0.777 ; 0.982] | 86%         | 72%         | 41% | 96%  | 3.03  | 0.2  |
| Model 46: CRP NGAL logIP_10               | 0.842 [0.719 ; 0.964] | 73%         | 76%         | 42% | 92%  | 3.03  | 0.35 |
| Model 26: logTRAIL logIL6                 | 0.826 [0.718 ; 0.934] | 67%         | 77%         | 42% | 91%  | 2.95  | 0.43 |
| Model 96: NGAL CRP logIL6 logIP_10        | 0.822 [0.704 ; 0.939] | 67%         | 77%         | 42% | 91%  | 2.95  | 0.43 |
| Model 20: logMXA CRP                      | 0.885 [0.759 ; 1.000] | 86%         | 71%         | 40% | 96%  | 2.91  | 0.2  |
| Model 73: logMXA logPCT CRP logIL6        | 0.882 [0.769 ; 0.995] | 86%         | 70%         | 40% | 96%  | 2.86  | 0.2  |
| Model 82: logMXA CRP logIP_10 logIL6      | 0.883 [0.777 ; 0.989] | 86%         | 69%         | 39% | 96%  | 2.75  | 0.21 |
| Model 48: CRP logPCT logMXA               | 0.889 [0.767 ; 1.000] | 86%         | 68%         | 39% | 95%  | 2.71  | 0.21 |
| Model 71: logMXA logPCT NGAL CRP          | 0.887 [0.763 ; 1.000] | 86%         | 68%         | 39% | 95%  | 2.71  | 0.21 |
| Model 59: NGAL logMXA logPCT              | 0.879 [0.759 ; 0.998] | 86%         | 68%         | 39% | 95%  | 2.71  | 0.21 |
| Model 33: logIL6 CRP logIP_10             | 0.820 [0.700 ; 0.941] | 73%         | 73%         | 39% | 92%  | 2.68  | 0.37 |
| Model 13: logPCT logMXA                   | 0.876 [0.764 ; 0.989] | 79%         | 70%         | 38% | 93%  | 2.62  | 0.31 |
| Model 40: logIL6 logIP_10 NGAL            | 0.805 [0.688 ; 0.922] | 67%         | 74%         | 39% | 90%  | 2.58  | 0.45 |
| Model 42: logIL6 logMXA logPCT            | 0.871 [0.769 ; 0.974] | 86%         | 67%         | 38% | 95%  | 2.57  | 0.21 |
| Model 8: logPCT NGAL                      | 0.792 [0.640 ; 0.945] | 87%         | 64%         | 37% | 95%  | 2.4   | 0.21 |
| Model 81: logMXA CRP NGAL logIL6          | 0.874 [0.756 ; 0.991] | 86%         | 64%         | 35% | 95%  | 2.38  | 0.22 |
| Model 32: logIL6 CRP logMXA               | 0.876 [0.761 ; 0.991] | 86%         | 62%         | 34% | 95%  | 2.27  | 0.23 |
| Model 43: logIL6 NGAL logPCT              | 0.764 [0.622 ; 0.906] | 93%         | 56%         | 34% | 97%  | 2.11  | 0.12 |
| Model 25: logIP_10 logIL6                 | 0.781 [0.659 ; 0.903] | 80%         | 61%         | 33% | 93%  | 2.07  | 0.33 |
| Model 16: NGAL logIL6                     | 0.683 [0.532 ; 0.834] | 87%         | 55%         | 32% | 94%  | 1.92  | 0.24 |
| Model 28: logIL6 CRP                      | 0.716 [0.555 ; 0.877] | 60%         | 66%         | 30% | 87%  | 1.77  | 0.61 |
| Model 83: logMXA NGAL logIP_10 logIL6     | 0.879 [0.779 ; 0.980] | 93%         | 46%         | 28% | 97%  | 1.72  | 0.16 |
| Model 56: NGAL logIP_10 logMXA            | 0.877 [0.751 ; 1.000] | 93%         | 46%         | 28% | 97%  | 1.72  | 0.16 |
| Model 30: logIL6 CRP logPCT               | 0.750 [0.599 ; 0.901] | 53%         | 69%         | 30% | 86%  | 1.71  | 0.68 |
| Model 87: logPCT NGAL logIL6 CRP          | 0.745 [0.594 ; 0.897] | 53%         | 69%         | 30% | 86%  | 1.71  | 0.68 |
| Model 24: logIP_10 CRP                    | 0.847 [0.724 ; 0.970] | 93%         | 45%         | 29% | 97%  | 1.7   | 0.15 |
| Model 21: logMXA logIL6                   | 0.836 [0.719 ; 0.953] | 86%         | 49%         | 28% | 94%  | 1.69  | 0.29 |
| Model 84: logPCT NGAL logIP_10 logIL6     | 0.855 [0.743 ; 0.966] | 93%         | 44%         | 29% | 96%  | 1.68  | 0.15 |
| Model 18: NGAL logIP_10                   | 0.828 [0.707 ; 0.949] | 93%         | 44%         | 29% | 96%  | 1.65  | 0.15 |
| Model 31: logIL6 CRP NGAL                 | 0.723 [0.562 ; 0.883] | 53%         | 68%         | 29% | 86%  | 1.65  | 0.69 |
| Model 38: logIL6 logIP_10 logMXA          | 0.856 [0.748 ; 0.964] | 100%        | 36%         | 26% | 100% | 1.56  | 0    |
| Model 6: NGAL                             | 0.725 [0.569 ; 0.880] | 73%         | 52%         | 27% | 89%  | 1.52  | 0.52 |
| Model 14: NGAL logMXA                     | 0.865 [0.738 ; 0.992] | 100%        | 31%         | 25% | 100% | 1.45  | 0    |
| Model 10: logPCT logIL6                   | 0.769 [0.628 ; 0.911] | 93%         | 34%         | 26% | 96%  | 1.42  | 0.19 |
| Model 19: logMXA logIP_10                 | 0.840 [0.705 ; 0.974] | 100%        | 28%         | 24% | 100% | 1.39  | 0    |
| Model 2: logIL6                           | 0.626 [0.472 ; 0.780] | 80%         | 42%         | 25% | 90%  | 1.38  | 0.48 |
| Model 41: logIL6 logMXA NGAL              | 0.858 [0.747 ; 0.970] | 100%        | 25%         | 23% | 100% | 1.33  | 0    |
| Model 5: logMXA                           | 0.828 [0.685 ; 0.971] | 93%         | 21%         | 21% | 93%  | 1.18  | 0.34 |
| Model 4: logIP_10                         | 0.819 [0.696 ; 0.943] | 100%        | 7%          | 21% | 100% | 1.07  | 0    |
| Model 7: logPCT                           | 0.792 [0.644 ; 0.941] | 93%         | 12%         | 21% | 88%  | 1.05  | 0.58 |

| > 3 months (92 days – 36 months; n=163)   |                       |             |             |     |     |      |      |
|-------------------------------------------|-----------------------|-------------|-------------|-----|-----|------|------|
| Models (N=98)                             | AUC [95% CI]          | Sensitivity | Specificity | PPV | NPV | LR+  | LR-  |
| Model 57: NGAL logTRAIL logMXA            | 0.782 [0.710 ; 0.854] | 75%         | 76%         | 69% | 81% | 3.1  | 0.33 |
| Model 65: logMXA logPCT logTRAIL logIL6   | 0.784 [0.712 ; 0.857] | 75%         | 71%         | 65% | 80% | 2.61 | 0.35 |
| Model 76: logMXA logTRAIL CRP NGAL        | 0.772 [0.698 ; 0.846] | 74%         | 70%         | 63% | 79% | 2.41 | 0.38 |
| Model 66: logMXA logPCT logTRAIL CRP      | 0.776 [0.703 ; 0.850] | 74%         | 69%         | 63% | 78% | 2.38 | 0.38 |
| Model 64: logMXA logPCT logTRAIL logIP_10 | 0.787 [0.715 ; 0.859] | 75%         | 68%         | 63% | 79% | 2.35 | 0.37 |
| Model 74: logMXA logTRAIL CRP logIL6      | 0.764 [0.690 ; 0.839] | 74%         | 68%         | 63% | 78% | 2.33 | 0.39 |
| Model 78: logMXA logTRAIL logIL6 logIP_10 | 0.760 [0.685 ; 0.835] | 74%         | 68%         | 63% | 78% | 2.33 | 0.39 |
| Model 37: logIL6 logTRAIL logMXA          | 0.759 [0.684 ; 0.834] | 74%         | 68%         | 63% | 78% | 2.33 | 0.39 |
| Model 63: logMXA logPCT logTRAIL          | 0.791 [0.719 ; 0.862] | 77%         | 67%         | 63% | 80% | 2.32 | 0.35 |
| Model 75: logMXA logTRAIL CRP logIP_10    | 0.767 [0.693 ; 0.842] | 74%         | 67%         | 62% | 78% | 2.25 | 0.39 |
| Model 52: CRP logMXA logTRAIL             | 0.766 [0.692 ; 0.841] | 74%         | 67%         | 62% | 78% | 2.25 | 0.39 |
| Model 69: logMXA logPCT logIP_10 logIL6   | 0.754 [0.677 ; 0.831] | 66%         | 70%         | 62% | 74% | 2.22 | 0.48 |
| Model 85: logPCT NGAL logIP_10 logTRAIL   | 0.789 [0.716 ; 0.861] | 77%         | 65%         | 61% | 79% | 2.18 | 0.36 |
| Model 77: logMXA logTRAIL logIL6 NGAL     | 0.774 [0.700 ; 0.847] | 75%         | 65%         | 61% | 79% | 2.16 | 0.38 |
| Model 67: logMXA logPCT logTRAIL NGAL     | 0.796 [0.725 ; 0.866] | 77%         | 64%         | 61% | 79% | 2.11 | 0.37 |
| Model 97: NGAL logTRAIL logIL6 logIP_10   | 0.770 [0.696 ; 0.844] | 79%         | 62%         | 60% | 81% | 2.1  | 0.33 |
| Model 34: logIL6 logTRAIL logIP_10        | 0.750 [0.673 ; 0.827] | 81%         | 61%         | 60% | 82% | 2.08 | 0.31 |
| Model 92: logPCT logIP_10 logTRAIL logIL6 | 0.767 [0.692 ; 0.843] | 72%         | 65%         | 60% | 76% | 2.05 | 0.43 |
| Model 26: logTRAIL logIL6                 | 0.773 [0.698 ; 0.848] | 84%         | 59%         | 59% | 84% | 2.04 | 0.27 |
| Model 62: logIP_10 logPCT logTRAIL        | 0.774 [0.700 ; 0.849] | 74%         | 64%         | 60% | 77% | 2.03 | 0.42 |
| Model 22: logMXA logTRAIL                 | 0.759 [0.684 ; 0.835] | 77%         | 62%         | 59% | 79% | 2.02 | 0.38 |
| Model 79: logMXA logTRAIL NGAL logIP_10   | 0.783 [0.711 ; 0.854] | 78%         | 61%         | 59% | 80% | 2    | 0.36 |
| Model 36: logIL6 logTRAIL NGAL            | 0.787 [0.714 ; 0.859] | 84%         | 58%         | 59% | 83% | 1.99 | 0.28 |
| Model 68: logMXA logPCT logIP_10 NGAL     | 0.776 [0.702 ; 0.849] | 72%         | 64%         | 59% | 76% | 1.99 | 0.44 |
| Model 54: NGAL logIP_10 logTRAIL          | 0.800 [0.730 ; 0.870] | 87%         | 56%         | 58% | 86% | 1.96 | 0.24 |
| Model 88: logPCT NGAL logIL6 logTRAIL     | 0.798 [0.727 ; 0.870] | 84%         | 56%         | 58% | 83% | 1.92 | 0.29 |
| Model 80: logMXA CRP NGAL logIP_10        | 0.744 [0.667 ; 0.822] | 77%         | 60%         | 58% | 78% | 1.91 | 0.39 |
| Model 35: logIL6 logTRAIL logPCT          | 0.791 [0.718 ; 0.863] | 82%         | 56%         | 58% | 82% | 1.89 | 0.31 |
| Model 61: logIP_10 logMXA logTRAIL        | 0.766 [0.692 ; 0.841] | 81%         | 57%         | 57% | 81% | 1.87 | 0.34 |
| Model 93: logPCT CRP logTRAIL logIL6      | 0.777 [0.704 ; 0.850] | 81%         | 56%         | 57% | 80% | 1.85 | 0.34 |
| Model 29: logIL6 CRP logTRAIL             | 0.776 [0.703 ; 0.849] | 81%         | 56%         | 57% | 80% | 1.83 | 0.34 |
| Model 94: NGAL CRP logTRAIL logIL6        | 0.775 [0.701 ; 0.848] | 81%         | 56%         | 57% | 80% | 1.83 | 0.34 |
| Model 58: NGAL logTRAIL logPCT            | 0.814 [0.746 ; 0.882] | 82%         | 54%         | 57% | 81% | 1.8  | 0.33 |
| Model 98: CRP logTRAIL logIL6 logIP_10    | 0.757 [0.682 ; 0.832] | 74%         | 59%         | 56% | 76% | 1.79 | 0.45 |
| Model 70: logMXA logPCT logIP_10 CRP      | 0.748 [0.671 ; 0.826] | 78%         | 56%         | 56% | 78% | 1.79 | 0.39 |
| Model 89: logPCT NGAL CRP logTRAIL        | 0.788 [0.717 ; 0.860] | 87%         | 51%         | 56% | 84% | 1.77 | 0.26 |
| Model 49: CRP logPCT logTRAIL             | 0.784 [0.713 ; 0.856] | 87%         | 51%         | 56% | 84% | 1.77 | 0.26 |
| Model 72: logMXA logPCT NGAL logIL6       | 0.763 [0.685 ; 0.840] | 81%         | 54%         | 56% | 80% | 1.77 | 0.35 |
| Model 45: CRP NGAL logTRAIL               | 0.785 [0.714 ; 0.857] | 85%         | 52%         | 56% | 83% | 1.76 | 0.29 |
| Model 27: logTRAIL CRP                    | 0.779 [0.706 ; 0.851] | 85%         | 52%         | 56% | 83% | 1.76 | 0.29 |
| Model 12: logPCT logIP_10                 | 0.742 [0.662 ; 0.822] | 75%         | 57%         | 56% | 76% | 1.76 | 0.44 |
| Model 39: logIL6 logIP_10 logPCT          | 0.741 [0.660 ; 0.822] | 75%         | 57%         | 56% | 76% | 1.76 | 0.44 |
| Model 23: logIP_10 logTRAIL               | 0.770 [0.695 ; 0.844] | 87%         | 51%         | 56% | 84% | 1.75 | 0.26 |
| Model 90: logPCT logIP_10 CRP logTRAIL    | 0.760 [0.685 ; 0.835] | 71%         | 60%         | 56% | 74% | 1.75 | 0.49 |
| Model 17: NGAL logTRAIL                   | 0.811 [0.742 ; 0.881] | 90%         | 48%         | 56% | 87% | 1.74 | 0.21 |
| Model 95: NGAL CRP logTRAIL logIP_10      | 0.770 [0.696 ; 0.843] | 82%         | 53%         | 55% | 81% | 1.74 | 0.34 |
| Model 60: logIP_10 logMXA logPCT          | 0.757 [0.680 ; 0.833] | 79%         | 54%         | 56% | 79% | 1.74 | 0.38 |
| Model 86: logPCT NGAL logIP_10 CRP        | 0.744 [0.666 ; 0.823] | 74%         | 57%         | 56% | 75% | 1.73 | 0.46 |
| Model 50: CRP logPCT logIP_10             | 0.730 [0.650 ; 0.810] | 74%         | 57%         | 56% | 75% | 1.73 | 0.46 |
| Model 82: logMXA CRP logIP_10 logIL6      | 0.731 [0.652 ; 0.810] | 78%         | 54%         | 55% | 77% | 1.68 | 0.41 |
| Model 53: CRP logIP_10 logTRAIL           | 0.758 [0.684 ; 0.833] | 85%         | 48%         | 54% | 82% | 1.65 | 0.3  |
| Model 47: CRP NGAL logMXA                 | 0.740 [0.660 ; 0.820] | 78%         | 53%         | 54% | 77% | 1.65 | 0.42 |
| Model 1: CRP                              | 0.738 [0.660 ; 0.815] | 87%         | 47%         | 54% | 83% | 1.65 | 0.28 |
| Model 51: CRP logMXA logIP_10             | 0.726 [0.645 ; 0.807] | 78%         | 53%         | 54% | 77% | 1.65 | 0.42 |
| Model 55: NGAL logIP_10 logPCT            | 0.767 [0.690 ; 0.845] | 75%         | 54%         | 54% | 75% | 1.64 | 0.46 |
| Model 11: logPCT logTRAIL                 | 0.804 [0.735 ; 0.874] | 81%         | 50%         | 54% | 78% | 1.62 | 0.38 |
| Model 20: logMXA CRP                      | 0.722 [0.640 ; 0.805] | 78%         | 52%         | 54% | 77% | 1.61 | 0.43 |
| Model 16: NGAL logIL6                     | 0.741 [0.664 ; 0.818] | 91%         | 43%         | 53% | 87% | 1.6  | 0.2  |
| Model 96: NGAL CRP logIL6 logIP_10        | 0.732 [0.653 ; 0.810] | 74%         | 54%         | 53% | 74% | 1.59 | 0.49 |
| Model 13: logPCT logMXA                   | 0.756 [0.677 ; 0.836] | 82%         | 48%         | 53% | 79% | 1.58 | 0.37 |
| Model 91: logPCT logIP_10 CRP logIL6      | 0.732 [0.652 ; 0.812] | 74%         | 53%         | 53% | 74% | 1.57 | 0.5  |
| Model 48: CRP logPCT logMXA               | 0.742 [0.662 ; 0.823] | 79%         | 49%         | 53% | 77% | 1.56 | 0.42 |
| Model 42: logIL6 logMXA logPCT            | 0.751 [0.672 ; 0.830] | 81%         | 48%         | 53% | 78% | 1.55 | 0.4  |
| Model 15: NGAL CRP                        | 0.766 [0.692 ; 0.840] | 88%         | 42%         | 52% | 83% | 1.52 | 0.28 |
| Model 40: logIL6 logIP_10 NGAL            | 0.735 [0.656 ; 0.814] | 71%         | 54%         | 52% | 72% | 1.52 | 0.55 |
| Model 59: NGAL logMXA logPCT              | 0.773 [0.696 ; 0.849] | 85%         | 44%         | 52% | 80% | 1.51 | 0.34 |
| Model 73: logMXA logPCT CRP logIL6        | 0.742 [0.662 ; 0.821] | 79%         | 47%         | 52% | 76% | 1.49 | 0.44 |
| Model 31: logIL6 CRP NGAL                 | 0.743 [0.665 ; 0.821] | 82%         | 44%         | 51% | 78% | 1.48 | 0.4  |
| Model 46: CRP NGAL logIP_10               | 0.737 [0.660 ; 0.815] | 75%         | 50%         | 52% | 73% | 1.48 | 0.51 |
| Model 28: logIL6 CRP                      | 0.737 [0.658 ; 0.816] | 84%         | 43%         | 51% | 79% | 1.48 | 0.38 |
| Model 33: logIL6 CRP logIP_10             | 0.720 [0.640 ; 0.800] | 75%         | 50%         | 52% | 73% | 1.48 | 0.51 |
| Model 21: logMXA logIL6                   | 0.703 [0.621 ; 0.784] | 78%         | 47%         | 52% | 75% | 1.48 | 0.47 |
| Model 71: logMXA logPCT NGAL CRP          | 0.749 [0.669 ; 0.829] | 79%         | 46%         | 51% | 75% | 1.46 | 0.45 |
| Model 30: logIL6 CRP logPCT               | 0.743 [0.665 ; 0.821] | 84%         | 43%         | 51% | 78% | 1.46 | 0.38 |
| Model 9: logPCT CRP                       | 0.754 [0.678 ; 0.830] | 90%         | 38%         | 51% | 84% | 1.45 | 0.27 |
| Model 32: logIL6 CRP logMXA               | 0.730 [0.649 ; 0.810] | 81%         | 44%         | 51% | 76% | 1.45 | 0.43 |
| Model 44: CRP NGAL logPCT                 | 0.769 [0.695 ; 0.843] | 87%         | 39%         | 51% | 80% | 1.43 | 0.34 |
| Model 87: logPCT NGAL logIL6 CRP          | 0.745 [0.666 ; 0.823] | 82%         | 43%         | 51% | 77% | 1.43 | 0.42 |
| Model 25: logIP_10 logIL6                 | 0.681 [0.598 ; 0.764] | 71%         | 51%         | 51% | 71% | 1.43 | 0.58 |
| Model 3: logTRAIL                         | 0.782 [0.709 ; 0.855] | 90%         | 37%         | 50% | 83% | 1.42 | 0.28 |
| Model 81: logMXA CRP NGAL logIL6          | 0.734 [0.654 ; 0.814] | 79%         | 43%         | 50% | 75% | 1.4  | 0.48 |
| Model 2: logIL6                           | 0.682 [0.599 ; 0.765] | 87%         | 38%         | 50% | 80% | 1.4  | 0.35 |
| Model 43: logIL6 NGAL logPCT              | 0.773 [0.699 ; 0.847] | 88%         | 36%         | 50% | 81% | 1.38 | 0.33 |
| Model 83: logMXA NGAL logIP_10 logIL6     | 0.739 [0.662 ; 0.817] | 93%         | 31%         | 49% | 85% | 1.33 | 0.24 |
| Model 41: logIL6 logMXA NGAL              | 0.736 [0.658 ; 0.815] | 91%         | 30%         | 48% | 82% | 1.29 | 0.3  |
| Model 38: logIL6 logIP_10 logMXA          | 0.706 [0.625 ; 0.787] | 88%         | 32%         | 48% | 79% | 1.29 | 0.37 |
| Model 6: NGAL                             | 0.791 [0.720 ; 0.862] | 97%         | 23%         | 48% | 92% | 1.26 | 0.13 |
| Model 56: NGAL logIP_10 logMXA            | 0.752 [0.677 ; 0.828] | 93%         | 26%         | 47% | 83% | 1.26 | 0.28 |
| Model 8: logPCT NGAL                      | 0.803 [0.731 ; 0.874] | 93%         | 26%         | 47% | 83% | 1.24 | 0.29 |
| Model 10: logPCT logIL6                   | 0.753 [0.675 ; 0.831] | 93%         | 25%         | 47% | 82% | 1.23 | 0.3  |
| Model 14: NGAL logMXA                     | 0.748 [0.671 ; 0.826] | 93%         | 24%         | 47% | 82% | 1.22 | 0.3  |
| Model 19: logMXA logIP_10                 | 0.673 [0.588 ; 0.758] | 87%         | 28%         | 47% | 75% | 1.21 | 0.47 |
| Model 84: logPCT NGAL logIP_10 logIL6     | 0.756 [0.677 ; 0.836] | 96%         | 19%         | 46% | 86% | 1.18 | 0.23 |
| Model 18: NGAL logIP_10                   | 0.756 [0.678 ; 0.834] | 96%         | 15%         | 45% | 82% | 1.12 | 0.3  |
| Model 24: logIP_10 CRP                    | 0.705 [0.624 ; 0.785] | 97%         | 14%         | 45% | 87% | 1.12 | 0.22 |
| Model 5: logMXA                           | 0.673 [0.588 ; 0.759] | 87%         | 22%         | 44% | 70% | 1.11 | 0.6  |
| Model 7: logPCT                           | 0.771 [0.695 ; 0.847] | 94%         | 7%          | 42% | 64% | 1.02 | 0.79 |
| Model 4: logIP_10                         | 0.575 [0.485 ; 0.664] | 99%         | 3%          | 42% | 75% | 1.02 | 0.47 |

Models achieving the targeted performance criteria are highlighted in green (light green: LR+≥ 5.67 but < 8.5 and/or LR- ≤ 0.5 but > 0.3; dark green: LR+ ≥ 8.5 and LR- ≤ 0.3).

The best performing model in the global population (model 57) is highlighted in red.

Abbreviations: AUC, area under the curve; CI, confidence interval; LR-, negative likelihood ratio; LR+, positive likelihood ratio; NPV, negative predictive value; PPV, positive predictive value.
